# Supplementary material for: First‐time parents' experiences related to parental self‐efficacy: A scoping review
Source: PubMed Central journal article supplement — Res Nurs Health. 2022 Dec 23;46(1):101–12. doi: 10.1002/nur.22285 (PMC10107989; doi:10.1002/nur.22285), 2022-12-23
Supplement: NUR-46-101-s001.pdf [file NUR-46-101-s001.pdf]

## Online supplementary appendix.

Table of included studies; their characteristics and their references

| Author/<br>Year/<br>Country                 | Study design                              | Time of<br>data-<br>collection  | Sample size<br>(nr of first-<br>time parents) | Gender | Unique<br>characteristics                      | SE theory        | SE level<br>domain/task | SE<br>terminology<br>used   |
|---------------------------------------------|-------------------------------------------|---------------------------------|-----------------------------------------------|--------|------------------------------------------------|------------------|-------------------------|-----------------------------|
| Alstveit et al., 2011, Norway               | Qualitative: interviews (unstructured)    | 11-14 mo. post.                 | 9 (all)                                       | women  | none                                           | No               | Domain                  | Confidence                  |
| Aston et al., 2016, Canada                  | Qualitative: interviews (semi-structured) | ns (within the first mo. post.) | 16 (all)                                      | women  | received targeted program or universal program | No               | Domain                  | Confidence                  |
| Aston et al., 2015, Canada <sub>R</sub>     | Qualitative: interviews (semi-structured) | ns (within the first mo. post.) | 16 (all)                                      | women  | received targeted program or universal program | No               | Domain                  | Confidence                  |
| Avery et al., 2009, USA* <sub>R</sub>       | Qualitative: focus groups                 | prenatal + 4-18 mo. post.       | 152 (all)                                     | women  | none                                           | Bandura + Dennis | Task                    | Confidence<br>Self-efficacy |
| Bäckström et al., 2010, Sweden <sub>R</sub> | Qualitative: interviews                   | 3-6 mo. post.                   | 9 (all)                                       | women  | none                                           | No               | Task                    | Confidence<br>Competence    |

|                                                         |                                                    |                                   |          |                            |                                                  |         |        |                                           |
|---------------------------------------------------------|----------------------------------------------------|-----------------------------------|----------|----------------------------|--------------------------------------------------|---------|--------|-------------------------------------------|
| Bailey et al.,<br>2004,<br>England                      | Qualitative:<br>interviews (semi-<br>structured)   | 37 wk. pre.<br>+ 3-9 wk.<br>post. | 16 (all) | women                      | low income                                       | No      | Task   | Confidence                                |
| Bailey,<br>2010,<br>England                             | Qualitative:<br>interviews (semi-<br>structured)   | 3-6 mo. post.                     | 7 (all)  | women                      | none                                             | No      | Domain | Confidence                                |
| Balaam &<br>Thomson,<br>2018, United<br>Kingdom         | Mixed methods:<br>interviews (semi-<br>structured) | 1 wk. post.                       | 11 (6)   | women                      | vulnerable, receiving<br>targeted perinatal ward | No      | Domain | Confidence                                |
| Barimani &<br>Wikström,<br>2015,<br>Sweden <sub>R</sub> | Qualitative: focus<br>groups                       | 10 days to 7<br>mo. post.         | 34 (26)  | women<br>(18),<br>men (16) | none                                             | No      | Domain | Confidence<br>Self-efficacy               |
| Beach<br>Copeland &<br>Harbaugh,<br>2017, USA*          | Mixed methods:<br>interviews (semi-<br>structured) | 2-4 mo. post.                     | 8 (all)  | women                      | low income                                       | Bandura | Domain | Self-efficacy<br>Competence<br>Confidence |

|                                                   |                                             |                                      |          |       |                                 |                  |        |                                           |
|---------------------------------------------------|---------------------------------------------|--------------------------------------|----------|-------|---------------------------------|------------------|--------|-------------------------------------------|
| Beattie-Fairchild, 2013, USA*                     | Mixed methods: interviews (semi-structured) | ns                                   | 15 (all) | women | young (18-20 years), vulnerable | Bandura + Dennis | Task   | Self-efficacy<br>Confidence               |
| Brown & Lee, 2011, United Kingdom                 | Qualitative: interviews (semi-structured)   | 6-12 mo. post.                       | 33 (22)  | women | none                            | No               | Task   | Confidence                                |
| Buultjens et al., 2019, Australia                 | Qualitative: interviews                     | Within 3 mo. post.                   | 10 (all) | women | well educated, middle class     | No               | Domain | Confidence<br>Self-efficacy               |
| Craig & Dietsch, 2010, Australia                  | Qualitative: interviews (semi-structured)   | 34 wk. pre + immediately after birth | 10 (all) | women | none                            | No               | Task   | Confidence<br>Self-efficacy               |
| Darvill et al., 2010, United Kingdom <sub>R</sub> | Qualitative: interviews (semi-structured)   | 6-15 wk. post.                       | 13 (all) | women | educated                        | No               | Domain | Confidence                                |
| de Montigny & Laharité,                           | Qualitative: interviews (semi-structured)   | within 12 days post.                 | 13 (all) | men   | none                            | Bandura          | Domain | Confidence<br>Self-efficacy<br>Competence |

|                                                 |                                                          |                                       |          |       |                                                |                  |        |                             |
|-------------------------------------------------|----------------------------------------------------------|---------------------------------------|----------|-------|------------------------------------------------|------------------|--------|-----------------------------|
| 2004,<br>Canada <sub>R</sub>                    |                                                          |                                       |          |       |                                                |                  |        |                             |
| Demirci et al., 2018,<br>USA                    | Qualitative: diary                                       | from birth to 8 wk. post.             | 35 (all) | women | most college-educated, economically privileged | No               | Task   | Confidence<br>Self-efficacy |
| Dykes, 2005,<br>England                         | Qualitative: focused interviews + observations           | 2-5 days post.                        | 61 (40)  | women | none                                           | No               | Task   | Confidence                  |
| Dykes et al., 2003, United Kingdom <sub>R</sub> | Qualitative: focus groups + interviews (semi-structured) | 2 wk. to 6 mo. post.                  | 20 (18)  | women | young (14-19 years)                            | Bandura + Dennis | Task   | Confidence<br>Self-efficacy |
| Edwards et al., 2018,<br>Scotland*              | Qualitative: focus groups                                | 28 wk. pre. + 11 days to 12 wk. post. | 18 (17)  | women | none                                           | Bandura + Dennis | Task   | Self-efficacy<br>Confidence |
| Feenstra et al., 2019,<br>Denmark               | Qualitative: interviews                                  | 2-4 wk. post.                         | 7 (4)    | women | none                                           | Bandura          | Domain | Self-efficacy<br>Confidence |

|                                                |                                                                    |                                                               |          |                           |                                                                |        |        |                                           |
|------------------------------------------------|--------------------------------------------------------------------|---------------------------------------------------------------|----------|---------------------------|----------------------------------------------------------------|--------|--------|-------------------------------------------|
| Fox et al.,<br>2015, United<br>Kingdom         | Qualitative:<br>interviews (semi-<br>structured) +<br>focus groups | first wk. to<br>over 6 mo.<br>post.                           | 51 (33)  | women                     | highly educated                                                | No     | Task   | Confidence<br>Self-efficacy               |
| Francis et<br>al., 2020,<br>Canada             | Qualitative:<br>interviews (semi-<br>structured) +<br>focus groups | 2-17 mo.<br>post.                                             | 46 (25)  | women                     | vulnerable, low-<br>income, immigrants                         | Dennis | Task   | Self-efficacy<br>Confidence               |
| Gaboury et<br>al., 2017,<br>Canada             | Qualitative:<br>interviews (semi-<br>structured)                   | first days<br>post. From<br>24 hours<br>post. to<br>discharge | 18 (12)  | women<br>(10),<br>men (8) | highly educated                                                | No     | Domain | Competence<br>Confidence                  |
| Gao et al.,<br>2012, China                     | Mixed methods:<br>interviews (semi-<br>structured)                 | 6 wk. post                                                    | 20 (all) | women                     | most caesarean and<br>from middle-class<br>families            | No     | Domain | Competence<br>Confidence                  |
| Harrison et<br>al., 2020,<br>United<br>Kingdom | Qualitative: focus<br>groups                                       | prenatal to<br>12 mo. post.                                   | 23 (17)  | women                     | self-identification of<br>anxiety (not<br>diagnosed), educated | No     | Domain | Confidence<br>Self-efficacy<br>Competence |

|                                  |                                           |                                              |          |                      |                                                      |                  |        |                              |
|----------------------------------|-------------------------------------------|----------------------------------------------|----------|----------------------|------------------------------------------------------|------------------|--------|------------------------------|
| Henshaw et al., 2018, USA        | Qualitative: focus groups                 | 6 wk. post                                   | 32 (17)  | women (26), men (6)  | none                                                 | No               | Domain | Confidence                   |
| Ho & Holroyd, 2002, China        | Qualitative: focus groups + observations  | ns (mothers asked about the first mo. post.) | 11 (all) | women                | high education/ income                               | No               | Domain | Confidence                   |
| Hoddinott et al., 2012, Scotland | Qualitative: interviews (semi-structured) | prenatal to 6 mo. post                       | 36 (19)  | women                | more advantaged people living in disadvantaged areas | No               | Task   | Confidence<br>Self-efficacy  |
| McInnes et al., 2013, Scotland*  | Qualitative: interviews (semi-structured) | prenatal to 6 mo. post.                      | 36 (19)  | women                | more advantaged people living in disadvantaged areas | Bandura + Dennis | Task   | Confidence,<br>Self-efficacy |
| Javadifar et al., 2016, Iran     | Qualitative: interviews (semi-structured) | up to 12 mo. post.                           | 26 (all) | women                | none                                                 | No               | Domain | Competence<br>Confidence     |
| Johansson et al., 2010, Sweden   | Qualitative: interviews + focus groups    | within 2 mo. post.                           | 21 (20)  | women (11), men (10) | none                                                 | No               | Domain | Confidence                   |

|                                   |                                                          |                               |          |       |                 |                  |        |                                           |
|-----------------------------------|----------------------------------------------------------|-------------------------------|----------|-------|-----------------|------------------|--------|-------------------------------------------|
| Kalinowski et al., 2012, Brazil   | Qualitative: interviews (semi-structured) + observations | from 1-43 days post.          | 16 (all) | women | none            | No               | Domain | Confidence<br>Competence                  |
| Kerrick, 2017, USA*               | Mixed methods: interviews (semi-structured)              | 9 and 11 wks. post.           | 2 (all)  | women | none            | Bandura + Dennis | Domain | Self-efficacy<br>Confidence<br>Competence |
| Khajehei et al., 2020, Australia* | Qualitative: interviews (semi-structured)                | within 1 wk. post.            | 16 (all) | women | none            | No               | Domain | Confidence<br>Self-efficacy<br>competence |
| Korukcu, 2020, Turkey             | Qualitative: interviews (semi-structured)                | 4-5 mo. post.                 | 18 (all) | women | none            | No               | Domain | Confidence<br>Competence                  |
| Kuswara et al., 2016, Australia   | Qualitative: interviews (semi-structured)                | 0-12 mo. post.                | 36 (23)  | women | highly educated | No               | Task   | Confidence<br>Self-efficacy               |
| Lafaurie, 2015, USA               | Qualitative: interviews (semi-structured)                | 0-12 mo. post. (1 was 15 mo.) | 15 (9)   | women | none            | Bandura          | Domain | Self-efficacy<br>Confidence<br>Competence |

|                                                             |                                                  |                        |          |       |                                                          |    |        |                                           |
|-------------------------------------------------------------|--------------------------------------------------|------------------------|----------|-------|----------------------------------------------------------|----|--------|-------------------------------------------|
| Law et al.,<br>2018,<br>Australia <sub>R</sub>              | Qualitative:<br>interviews (semi-<br>structured) | 6-8 mo. post.          | 32 (all) | women | EPDS spectrum (not<br>clinical disorder)                 | No | Domain | Confidence<br>Self-efficacy<br>Competence |
| Leahy-<br>Warren et<br>al., 2017,<br>Ireland                | Qualitative:<br>interviews (semi-<br>structured) | 3.5-14 mo.<br>post     | 7 (6)    | women | third level education                                    | No | Task   | Confidence                                |
| Löf et al.,<br>2006,<br>Sweden                              | Qualitative:<br>interviews                       | 1 wk. post.            | 9 (all)  | women | none                                                     | No | Domain | Confidence                                |
| Marshall et<br>al., 2007,<br>England <sub>R</sub>           | Qualitative:<br>interviews +<br>observations     | 3 wk. to 6<br>mo. post | 22 (16)  | women | none                                                     | No | Task   | Confidence                                |
| Martell,<br>2001, USA <sub>R</sub>                          | Qualitative:<br>interviews                       | 3-27 days<br>post.     | 32 (all) | women | none                                                     | No | Domain | Confidence<br>Competence                  |
| Masala-<br>Chokwe &<br>Ramukumba<br>, 2017,<br>South-Africa | Qualitative:<br>interviews (semi-<br>structured) | within 6 wk.<br>post.  | 14 (all) | women | young (<21 years),<br>unmarried, half were<br>unemployed | No | Domain | Confidence<br>Competence                  |



|                                                     |                                           |                                                         |          |       |                                                         |                |        |                                           |
|-----------------------------------------------------|-------------------------------------------|---------------------------------------------------------|----------|-------|---------------------------------------------------------|----------------|--------|-------------------------------------------|
| Mbekenga et al., 2011, Tanzania                     | Qualitative: interviews (semi-structured) | 4-10 wk. post                                           | 10 (all) | men   | multicultural, low-income, suburban setting             | No             | Domain | Confidence                                |
| Midtsund et al., 2019, Norway                       | Qualitative: interviews                   | 1-7 mo. post.                                           | 12 (7)   | women | highly educated, insecure and stressed, (not diagnosed) | No             | Domain | Confidence                                |
| Missal, 2013, Oman & the United Arab Emirates (UAE) | Qualitative: interviews (semi-structured) | prenatal to 40 days post (Oman) and post-delivery (UAE) | 34 (all) | women | none                                                    | No             | Domain | Confidence                                |
| Moore & Coty, 2006, USA*                            | Qualitative: focus groups, one interview  | prenatal and 6-8 wk. post.                              | 9 (all)  | women | upper-middle class to middle-class                      | Dennis + Ajzen | Task   | Confidence<br>Self-efficacy               |
| Ngai et al., 2011, China*                           | Qualitative: interviews (semi-structured) | 6 wks. post.                                            | 26 (all) | women | none                                                    | Bandura        | Domain | Competence<br>Confidence<br>Self-efficacy |

|                                 |                                           |                |          |       |           |         |        |                                           |
|---------------------------------|-------------------------------------------|----------------|----------|-------|-----------|---------|--------|-------------------------------------------|
| Ngai & Chan, 2019, China        | Qualitative: interviews (semi-structured) | 6 wks. post.   | 39 (all) | women | >=10 EPDS | Bandura | Domain | Confidence<br>Competence<br>Self-efficacy |
| Sheehan et al., 2009, Australia | Qualitative: interviews                   | 1-9 wks. post. | 37 (23)  | women | none      | Dennis  | Task   | Confidence<br>Competence                  |
| Shorey et al., 2018, Singapore  | Qualitative: interviews (semi-structured) | 1 wk. post.    | 50 (34)  | men   | none      | Bandura | Domain | Competence<br>Confidence                  |
| Shorey et al., 2019, Singapore  | Qualitative: interviews (semi-structured) | 6 mo. post.    | 50 (34)  | men   | none      | Bandura | Domain | Confidence                                |
| Shorey et al., 2015, Singapore  | Qualitative: interviews (semi-structured) | 6-9 wks. post. | 18 (all) | women | none      | Bandura | Domain | Self-efficacy<br>Confidence               |
| Shorey et al., 2017, Singapore  | Qualitative: interviews (semi-structured) | 1-2 wk. post.  | 15 (all) | men   | none      | No      | Domain | Confidence<br>Self-efficacy               |

|                                     |                                           |                     |          |       |                        |         |        |                                           |
|-------------------------------------|-------------------------------------------|---------------------|----------|-------|------------------------|---------|--------|-------------------------------------------|
| Shorey & Ng, 2019, Singapore        | Qualitative: interviews (semi-structured) | 1 mo. post.         | 16 (10)  | women | none                   | Bandura | Domain | Self-efficacy<br>Confidence<br>Competence |
| St. John et al., 2005, Australia    | Qualitative: interviews                   | 6-12 wks. post.     | 18 (12)  | men   | none                   | No      | Domain | Confidence                                |
| Suplee et al., 2015, USA            | Qualitative: interviews (semi-structured) | 1 wk. to 6 mo. post | 13 (all) | women | vulnerable/ low income | No      | Domain | Confidence                                |
| Wilkins, 2006, England              | Qualitative: interviews                   | 6 wks. post.        | 8 (all)  | women | none                   | No      | Domain | Confidence<br>Competence                  |
| Xiao et al., 2020, China            | Qualitative: interviews (semi-structured) | within 6 wks. post. | 22 (14)  | women | none                   | No      | Task   | Self-efficacy<br>Competence<br>Confidence |
| Zwedberg, 2010, Sweden <sub>R</sub> | Qualitative: interviews + 19 observations | 3 mo. post.         | 14 (9)   | women | none                   | No      | Task   | Self-efficacy<br>Confidence<br>Competence |

Legend: Wks. = weeks; mo. = months; post. = postpartum; \* = PSE was directly addressed in the title and/or aim; <sub>R</sub> = from reference-list

## References:

- Alstveit, M., Severinsson, E., & Karlsen, B. (2011). Readjusting one's life in the tension inherent in work and motherhood. *Journal of Advanced Nursing*, 67(10), 2151–2160. <https://doi.org/10.1111/j.1365-2648.2011.05660.x>
- Aston, M., Etowa, J., Price, S., Vukic, A., Hart, C., MacLeod, E., & Randel, P. (2016). Public health nurses and mothers challenge and shift the meaning of health outcomes. *Global Qualitative Nursing Research*, 3, 1–10. <https://doi.org/10.1177/2333393616632126>
- Aston, M., Price, S., Etowa, J., Vukic, A., Young, L., Hart, C., MacLeod, E., & Randel, P. (2015). The power of relationships: Exploring how public health nurses support mothers and families during postpartum home visits. *Journal of Family Nursing*, 21(1), 11–34. <https://doi.org/10.1177/1074840714561524>
- Avery, A., Zimmermann, K., Underwood, P. W., & Magnus, J. H. (2009). Confident commitment is a key factor for sustained breastfeeding. *Birth*, 36(2), 141–148. <https://doi.org/https://doi.org/10.1111/j.1523-536X.2009.00312.x>
- Bäckström, C. A., Wahn, E. I. H., & Ekström, A. C. (2010). Two sides of breastfeeding support: Experiences of women and midwives. *International Breastfeeding Journal*, 5(20). <https://doi.org/10.1186/1746-4358-5-20>
- Bailey, C., Pain, R. H., & Aarvold, J. E. (2004). A “give it a go” breast-feeding culture and early cessation among low-income mothers. *Midwifery*, 20(3), 240–250. <https://doi.org/10.1016/j.midw.2003.12.003>
- Bailey, S. (2010). Postnatal care: Exploring the views of first-time mothers. *Community Practitioner: The Journal of the Community Practitioners' & Health Visitors' Association*, 83(12), 26–29. <https://pubmed.ncbi.nlm.nih.gov/21214136/>

- Balaam, M. C., & Thomson, G. (2018). Building capacity and wellbeing in vulnerable/marginalised mothers: A qualitative study. *Women and Birth*, 31(5), e341–e347. <https://doi.org/10.1016/j.wombi.2017.12.010>
- Barimani, M., & Vikström, A. (2015). Successful early postpartum support linked to management, informational, and relational continuity. *Midwifery*, 31(8), 811–817. <https://doi.org/10.1016/j.midw.2015.04.009>
- Beach Copeland, D., & Harbaugh, B. L. (2017). Early maternal-efficacy and competence in first-time, low-income mothers. *Comprehensive Child and Adolescent Nursing*, 40(1), 6–28. <https://doi.org/10.1080/24694193.2016.1200695>
- Beattie-Fairchild, C. (2013). *Overcoming barriers to improve breastfeeding self-efficacy in older adolescent mothers* (Doctoral dissertation). Walden University.
- Brown, A., & Lee, M. (2011). An exploration of the attitudes and experiences of mothers in the United Kingdom who chose to breastfeed exclusively for 6 months postpartum. *Breastfeeding Medicine*, 6(4), 197–204. <https://doi.org/10.1089/bfm.2010.0097>
- Buultjens, M., Murphy, G., Ruddock-Hudson, M., Milgrom, J., & Taket, A. (2019). A qualitative study of women’s experience of a perinatal group health-promoting programme. *British Journal of Midwifery*, 27(2), 106–114. <https://doi.org/10.12968/bjom.2019.27.2.106>
- Craig, H. J., & Dietsch, E. (2010). “Too scary to think about”: First time mothers’ perceptions of the usefulness of antenatal breastfeeding education. *Women & Birth*, 23(4), 160–165. <https://doi.org/10.1016/j.wombi.2010.04.004>
- Darvill, R., Skirton, H., & Farrand, P. (2010). Psychological factors that impact on women’s experiences of first-time motherhood: A qualitative study of the transition. *Midwifery*, 26(3), 357–366. <https://doi.org/10.1016/j.midw.2008.07.006>

- de Montigny, F., & Lacharité, C. (2004). Fathers' perceptions of the immediate postpartal period. *Journal of Obstetric, Gynecologic, & Neonatal Nursing*, 33(3), 328–339. <https://doi.org/10.1177/0884217504266012>
- Demirci, J., Caplan, E., Murray, N., & Cohen, S. (2018). “I just want to do everything right”: Primiparous women’s accounts of early breastfeeding via an app-based diary. *Journal of Pediatric Health Care*, 32(2), 163–172. <https://doi.org/10.1016/j.pedhc.2017.09.010>
- Dykes, F. (2005). “Supply” and “demand”: Breastfeeding as labour. *Social Science & Medicine*, 60(10), 2283–2293. <https://doi.org/10.1016/j.socscimed.2004.10.002>
- Dykes, F., Moran, V. H., Burt, S., & Edwards, J. (2003). Adolescent mothers and breastfeeding: experiences and support needs—an exploratory study. *Journal of Human Lactation*, 19(4), 391–401. <https://doi.org/10.1177/0890334403257562>
- Edwards, M. E., Jepson, R. G., & McInnes, R. J. (2018). Breastfeeding initiation: An in-depth qualitative analysis of the perspectives of women and midwives using Social Cognitive Theory. *Midwifery*, 57, 8–17. <https://doi.org/10.1016/j.midw.2017.10.013>
- Feenstra, M. M., Nilsson, I., & Danbjørg, D. B. (2019). Broken expectations of early motherhood: Mothers’ experiences of early discharge after birth and readmission of their infants. *Journal of Clinical Nursing*, 28(5/6), 870–881. <https://doi.org/10.1111/jocn.14687>
- Fox, R., McMullen, S., & Newburn, M. (2015). UK women’s experiences of breastfeeding and additional breastfeeding support: A qualitative study of Baby Café services. *BMC Pregnancy & Childbirth*, 15(147). <https://doi.org/10.1186/s12884-015-0581-5>

- Francis, J., Mildon, A., Stewart, S., Underhill, B., Tarasuk, V., Di Ruggiero, E., Sellen, D., & O'Connor, D. L. (2020). Vulnerable mothers' experiences breastfeeding with an enhanced community lactation support program. *Maternal and Child Nutrition, 16*(3), e12957. <https://doi.org/10.1111/mcn.12957>
- Gaboury, J., Capaday, S., Somera, J., & Purden, M. (2017). Effect of the postpartum hospital environment on the attainment of mothers' and fathers' goals. *Journal of Obstetric Gynecologic and Neonatal Nursing, 46*(1), 40–50. <https://doi.org/10.1016/j.jogn.2016.08.008>
- Gao, L.-l., Luo, S.-y., & Chan, S. W.-c. (2012). Interpersonal psychotherapy-oriented program for Chinese pregnant women: Delivery, content, and personal impact. *Nursing & Health Sciences, 14*(3), 318–324. <https://doi.org/10.1111/j.1442-2018.2012.00722.x>
- Harrison, V., Moore, D., & Lazard, L. (2020). Supporting perinatal anxiety in the digital age: A qualitative exploration of stressors and support strategies. *BMC Pregnancy and Childbirth, 20*(1), 363. <https://doi.org/10.1186/s12884-020-02990-0>
- Henshaw, E. J., Cooper, M. A., Jaramillo, M., Lamp, J. M., Jones, A. L., & Wood, T. L. (2018). “Trying to figure out if you're doing things right, and where to get the info”: Parents recall information and support needed during the first 6 weeks postpartum. *Maternal and Child Health Journal, 22*(11), 1668–1675. <https://doi.org/10.1007/s10995-018-2565-3>
- Ho, I., & Holroyd, E. (2002). Chinese women's perceptions of the effectiveness of antenatal education in the preparation for motherhood. *Journal of Advanced Nursing, 38*(1), 74–85. <https://doi.org/10.1046/j.1365-2648.2002.02148.x>
- Hoddinott, P., Craig, L. C. A., Britten, J., & McInnes, R. J. (2012). A serial qualitative interview study of infant feeding experiences: Idealism meets realism. *BMJ Open, 2*(2), e000504. <https://doi.org/10.1136/bmjopen-2011-000504>

- Javadifar, N., Majlesi, F., Nikbakht, A., Nedjat, S., & Montazeri, A. (2016). Journey to motherhood in the first year after child birth. *Journal of Family and Reproductive Health, 10*(3), 146–153. <https://jfrh.tums.ac.ir/index.php/jfrh/article/view/438>
- Johansson, K., Aarts, C., & Darj, E. (2010). First-time parents' experiences of home-based postnatal care in Sweden. *Upsala Journal of Medical Sciences, 115*(2), 131–137. <https://doi.org/10.3109/03009730903431809>
- Kalinowski, L. s. C., Favero, L., Carraro, T. E., Wall, M. L., & Lacerda, M. R. (2012). Postpartum primipara at home and associated nursing care: Grounded theory. *Online Brazilian Journal of Nursing, 11*(3), 701–719. <https://doi.org/10.5935/1676-4285.20120046>
- Kerrick, M. R. (2017). *Refining the role of social support in first-time mothers' development of parental self-efficacy* (Doctoral dissertation). University of California, Santa Cruz. <https://escholarship.org/content/qt3n49f1mc/qt3n49f1mc.pdf>
- Khajehei, M., Swain, J. A., & Wen, Y. (2020). Primiparous women's narratives of confidence in the perinatal period. *British Journal of Midwifery, 28*(1), 42–50. <https://doi.org/10.12968/bjom.2020.28.1.42>
- Korukcu, O. (2020). Psycho-adaptive changes and psychological growth after childbirth in primiparous women. *Perspectives in Psychiatric Care, 56*(1), 213–221. <https://doi.org/10.1111/ppc.12413>
- Kuswara, K., Laws, R., Kremer, P., Hesketh, K. D., & Campbell, K. J. (2016). The infant feeding practices of Chinese immigrant mothers in Australia: A qualitative exploration. *Appetite, 105*, 375–384. <https://doi.org/10.1016/j.appet.2016.06.008>
- Lafaurie, E. (2015). *Postpartum adaptation and competence of mothers who use hypnosis to birth* (Doctoral dissertation). Arizona State University. <https://hdl.handle.net/2286/R.I.36473>



- Law, K. H., Jackson, B., Guelfi, K., Nguyen, T., & Dimmock, J. A. (2018). Understanding and alleviating maternal postpartum distress: Perspectives from first-time mothers in Australia. *Social Science & Medicine*, *204*, 59–66.  
<https://doi.org/10.1016/j.socscimed.2018.03.022>
- Leahy-Warren, P., Creedon, M., O'Mahony, A., & Mulcahy, H. (2017). Normalising breastfeeding within a formula feeding culture: An Irish qualitative study. *Women and Birth*, *30*(2), e103–e110. <https://doi.org/10.1016/j.wombi.2016.10.002>
- Löf, M., Svalenius, E. C., & Persson, E. K. (2006). Factors that influence first-time mothers' choice and experience of early discharge. *Scandinavian Journal of Caring Sciences*, *20*(3), 323–330. <https://doi.org/10.1111/j.1471-6712.2006.00411.x>
- Marshall, J. L., Godfrey, M., & Renfrew, M. J. (2007). Being a 'good mother': Managing breastfeeding and merging identities. *Social Science & Medicine*, *65*(10), 2147–2159. <https://doi.org/10.1016/j.socscimed.2007.06.015>
- Martell, L. K. (2001). Heading toward the new normal: A contemporary postpartum experience. *Journal of Obstetric, Gynecologic, & Neonatal Nursing*, *30*(5), 496–506. <https://doi.org/10.1111/j.1552-6909.2001.tb01569.x>
- Masala-Chokwe, M. E. T., & Ramukumba, T. S. (2017). The lived experiences and social support needs of first-time mothers at health care facilities in the City of Tshwane, South Africa. *Curationis*, *40*(1), a1680. <https://doi.org/10.4102/curationis.v40i1.1680>
- Mbekenga, C. K., Lugina, H. I., Christensson, K., & Olsson, P. (2011). Postpartum experiences of first-time fathers in a Tanzanian suburb: A qualitative interview study. *Midwifery*, *27*(2), 174–180. <https://doi.org/10.1016/j.midw.2009.03.002>

- McInnes, R. J., Hoddinott, P., Britten, J., Darwent, K., & Craig, L. C. A. (2013). Significant others, situations and infant feeding behaviour change processes: A serial qualitative interview study. *BMC Pregnancy and Childbirth*, *13*(114).  
<https://doi.org/10.1186/1471-2393-13-114>
- Midtsund, A., Litland, A., & Hjälmhult, E. (2019). Mothers' experiences learning and performing infant massage—a qualitative study. *Journal of Clinical Nursing*, *28*(3/4), 489–498. <https://doi.org/10.1111/jocn.14634>
- Missal, B. (2013). Gulf Arab women's transition to motherhood. *Journal of Cultural Diversity*, *20*(4), 170–176.  
<https://pubmed.ncbi.nlm.nih.gov/24575592/>
- Moore, E. R., & Coty, M. B. (2006). Prenatal and postpartum focus groups with primiparas: Breastfeeding attitudes, support, barriers, self-efficacy, and intention. *Journal of Pediatric Health Care*, *20*(1), 35–46. <https://doi.org/10.1016/j.pedhc.2005.08.007>
- Ngai, F.-W., Chan, S. W. C., & Holroyd, E. (2011). Chinese primiparous women's experiences of early motherhood: Factors affecting maternal role competence. *Journal of Clinical Nursing*, *20*(9-10), 1481–1489. <https://doi.org/10.1111/j.1365-2702.2010.03415.x>
- Ngai, F. W., & Chan, P. S. (2019). A qualitative evaluation of telephone-based cognitive-behavioral therapy for postpartum mothers. *Clinical Nursing Research*, *28*(7), 852–868. <https://doi.org/10.1177/1054773818768011>
- Sheehan, A., Schmied, V., & Barclay, L. (2009). Women's experiences of infant feeding support in the first 6 weeks post-birth. *Maternal and Child Nutrition*, *5*(2), 138–150. <https://doi.org/10.1111/j.1740-8709.2008.00163.x>
- Shorey, S., Ang, L., & Goh, E. C. L. (2018). Lived experiences of Asian fathers during the early postpartum period: Insights from qualitative inquiry. *Midwifery*, *60*, 30–35. <https://doi.org/10.1016/j.midw.2018.02.009>

- Shorey, S., Ang, L., Goh, E. C. L., & Lopez, V. (2019). Paternal involvement of Singaporean fathers within six months postpartum: A follow-up qualitative study. *Midwifery*, *70*, 7–14. <https://doi.org/10.1016/j.midw.2018.12.003>
- Shorey, S., Chan, S. W.-C., Chong, Y. S., & He, H.-G. (2015). Perceptions of primiparas on a postnatal psychoeducation programme: The process evaluation. *Midwifery*, *31*(1), 155–163. <https://doi.org/10.1016/j.midw.2014.08.001>
- Shorey, S., Dennis, C.-L., Bridge, S., Chong, Y. S., Holroyd, E., & He, H.-G. (2017). First-time fathers' postnatal experiences and support needs: A descriptive qualitative study. *Journal of Advanced Nursing*, *73*(12), 2987–2996. <https://doi.org/10.1111/jan.13349>
- Shorey, S., & Ng, E. D. (2019). Evaluation of mothers' perceptions of a technology-based supportive educational parenting program (part 2): Qualitative study. *Journal of Medical Internet Research*, *21*(2), e11065. <https://doi.org/10.2196/11065>
- St John, W., Cameron, C., & McVeigh, C. (2005). Meeting the challenge of new fatherhood during the early weeks. *Journal of Obstetric, Gynecologic, & Neonatal Nursing*, *34*(2), 180–189. <https://doi.org/10.1177/0884217505274699>
- Suplee, P. D., Gardner, M. R., & Borucki, L. C. (2014). Low-income, urban minority women's perceptions of self- and infant care during the postpartum period. *Journal of Obstetric Gynecologic and Neonatal Nursing*, *43*(6), 803–812. <https://doi.org/10.1111/1552-6909.12506>
- Wilkins, C. (2006). A qualitative study exploring the support needs of first-time mothers on their journey towards intuitive parenting. *Midwifery*, *22*(2), 169–180. <https://doi.org/10.1016/j.midw.2005.07.001>

- Xiao, X., Loke, A. Y., Zhu, S. N., Gong, L., Shi, H. M., & Ngai, F. W. (2020). "The sweet and the bitter": Mothers' experiences of breastfeeding in the early postpartum period: a qualitative exploratory study in China. *International Breastfeeding Journal*, 15(12).  
<https://doi.org/10.1186/s13006-020-00256-1>
- Zwedberg, S. (2010). *Ville amma! : En hermeneutisk studie av mödrar med amningsbesvär; deras upplevelser, problemlösning samt amningskonsultativa möten* (Doctoral dissertation). Stockholm University. <http://urn.kb.se/resolve?urn=urn:nbn:se:su:diva-38122>
